# Supplementary material for: Vibrio cholerae O139 genomes provide a clue to why it may have failed to usher in the eighth cholera pandemic
Source: PubMed Central journal article supplement (PMC9256687; doi:10.1038/s41467-022-31391-4), 2022-07-05
Supplement: 41467_2022_31391_MOESM1_ESM.pdf [file 41467_2022_31391_MOESM1_ESM.pdf]

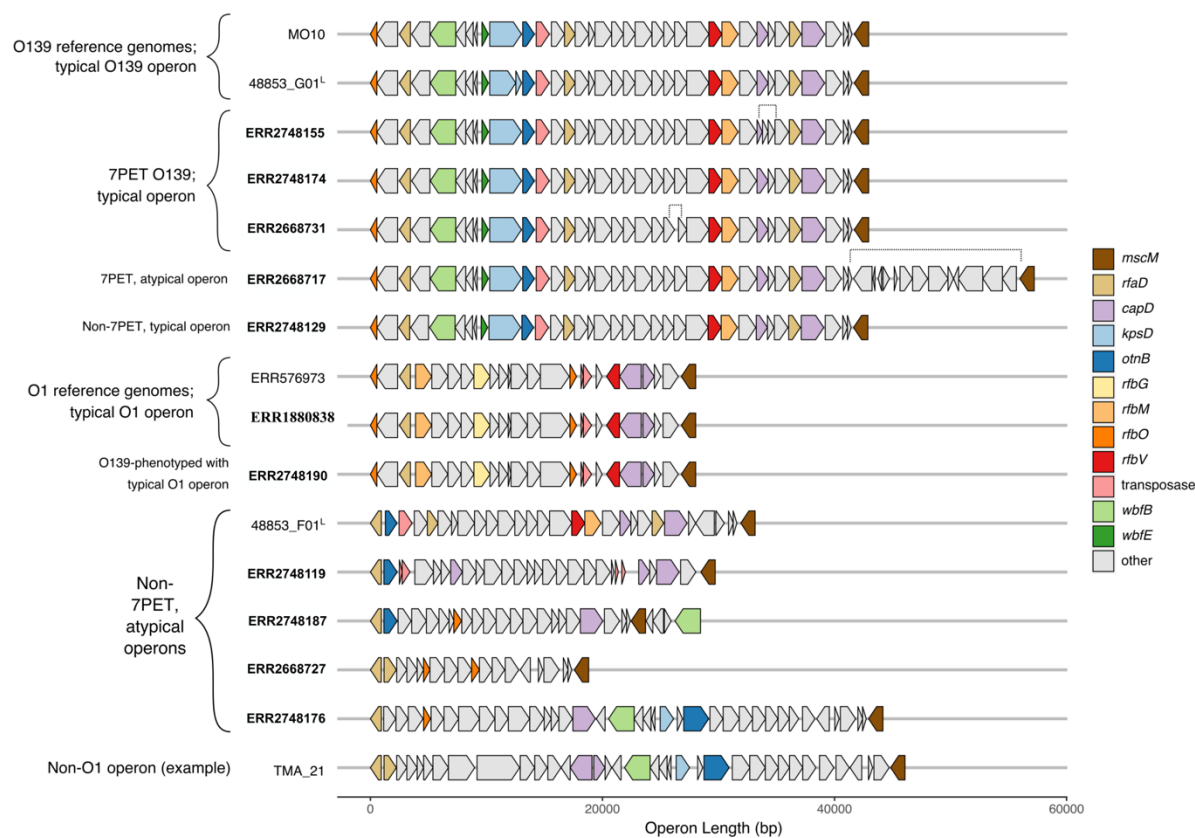

1

2 **S. Figure 1:** Variation in the gene order and arrangement of the O139 operon within our  
 3 dataset, compared to selected O139, O1 and non-O1/O139 references. Gene homology was  
 4 based on HMM models and gene arrangement was gleaned from the annotated assemblies.  
 5 Genes are coloured by function (see key). Some variations in the arrangement of the typical  
 6 O139 operon are highlighted with faint brackets. Genomes from our dataset are denoted by  
 7 bold font. All genomes were sequenced with short read technology, except for those denoted  
 8 by L, which were sequenced using long read technology. For simplicity, only one or two  
 9 examples of each variant are shown.

10

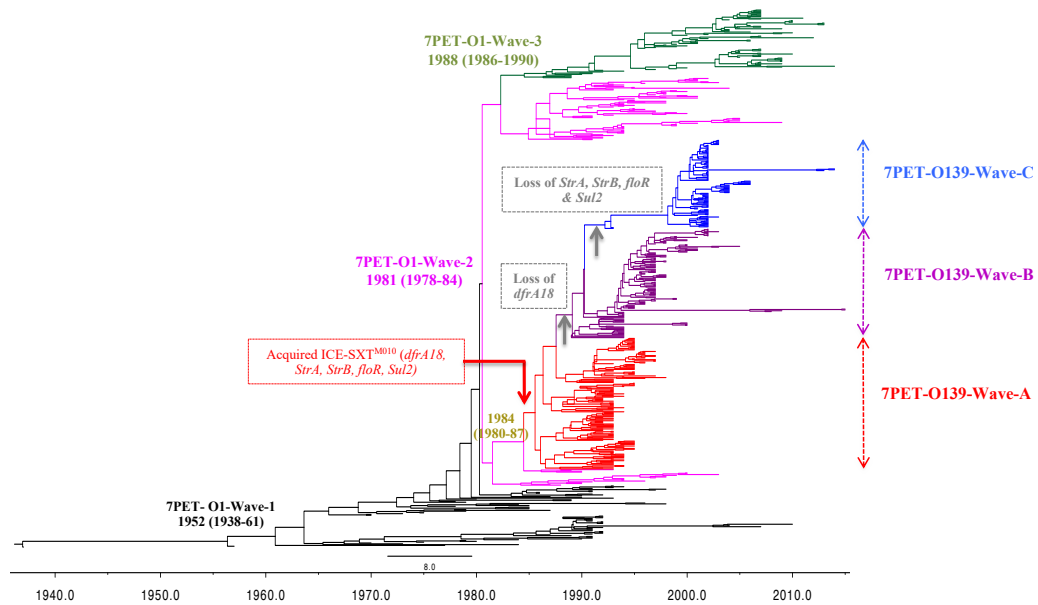

11

12 **S. Figure 2: Bayesian time-measured phylogeny of 7PET including the O139**  
 13 **sublineage.** Highlighted dates represent the most recent common ancestor (MRCA)  
 14 shared by the *V. cholerae* O1 waves (1-3) and O139 waves (A-C) as median values  
 15 predicted by BEAST with 95% confidence intervals on the estimated date. The dotted  
 16 lines indicate the entire O139 lineage with three waves marked as wave A, B and C.  
 17 Three important events of ICE SXT acquisition to successive AMR loss have been  
 18 marked with arrows.

19

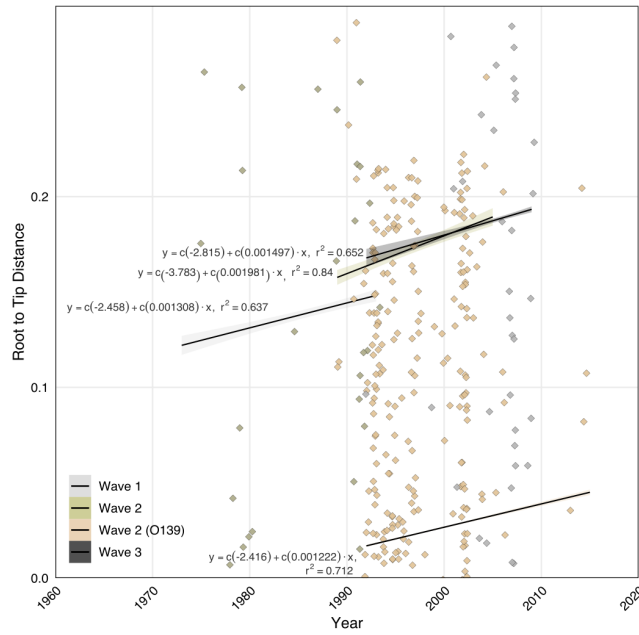

20

21 **S. Figure 3: Evolutionary dynamics of *V. cholerae* O139 in the context of *V.***  
 22 ***cholerae* 7PET transmission waves.** Linear regression plot of the relationship between  
 23 the RTT and year of isolation, i.e. the SNP accumulation rate of each of the O1  
 24 transmission waves, and the O139 sublineage. Points are coloured by wave (see key).  
 25 R<sup>2</sup> values and equations of the lines are also shown in the plots. The mean RTT is  
 26 depicted by the linear regression line, with standard error depicted by the shaded bars.  
 27 R<sup>2</sup> values and equations of the lines are also shown in the plots.

28

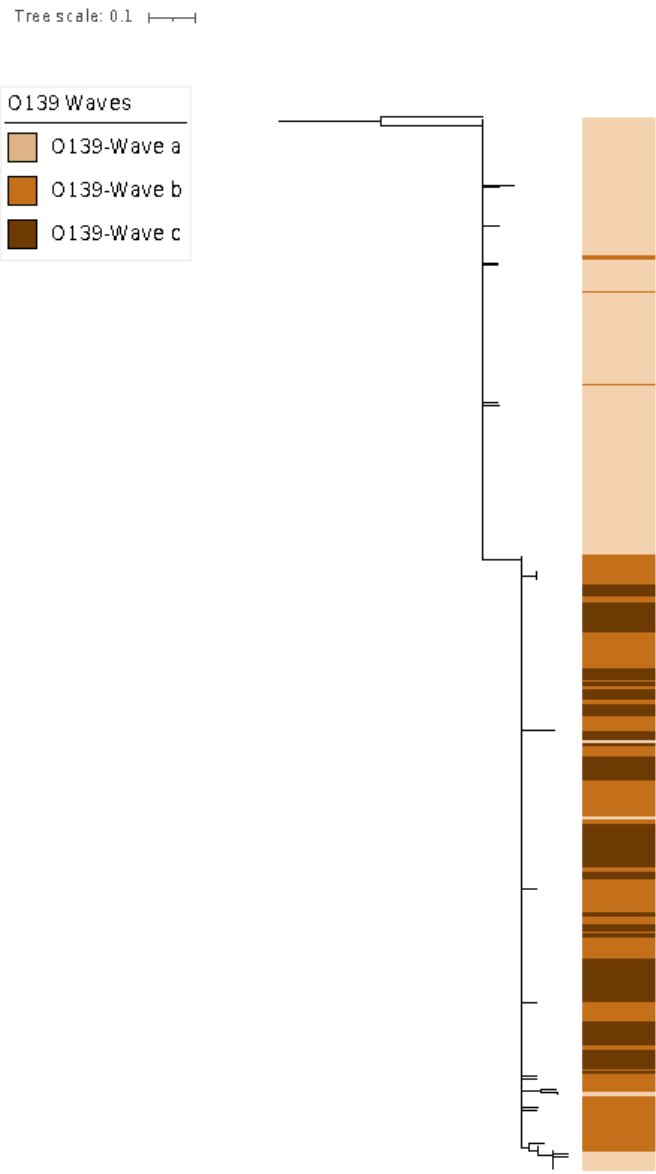

29

30 **S. Figure 4: Maximum likelihood phylogenetic tree of the core ICE SXT. *V.***  
 31 *cholerae* O139 ICE SXT element analysis constructed with 36 SNPs from a whole  
 32 alignment of 51,961 bases against the reference AY055428. Each of the O139 waves-  
 33 A to C are represented as a coloured strip (see key).

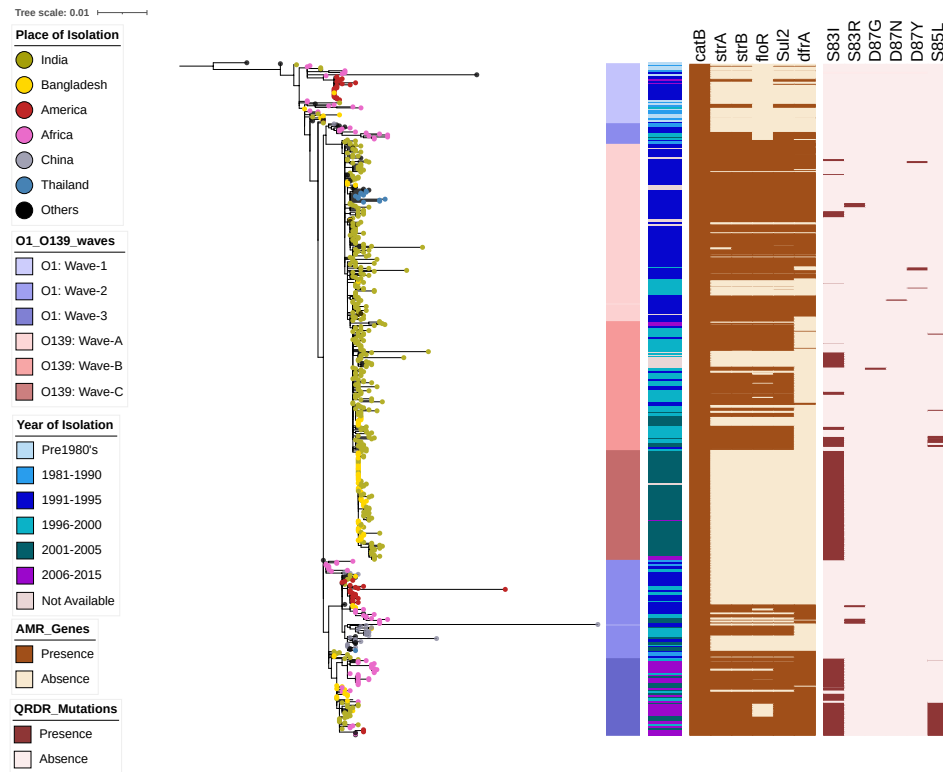

35

36 **S. Figure 5: Maximum likelihood phylogenetic tree of the 7PET O1 and O139 sub-**  
 37 **lineage.** Place of isolation was labelled as colored branch tips. Color bar indicates the  
 38 O1 wave, serogroups and year of isolation. Presence/Absence of antimicrobial  
 39 resistance genes and the chromosomal QRDR mutations (*GyrA*-S83I, S83R, D87G,  
 40 D87N, D87Y; *parC* – S85L) are labelled for 7PET O1 and O139 strains. Scale bar  
 41 represents the number of substitutions per site per genome

42

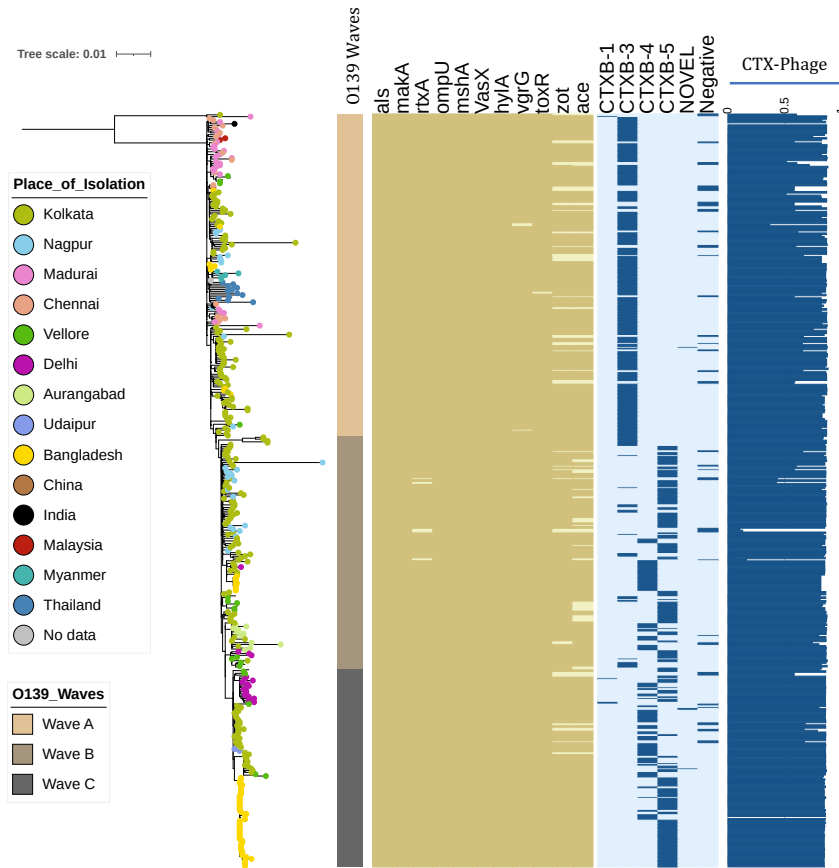

43

44 **S. Figure 6: Virulence gene distribution among *V. cholerae* 7PET O139.** Maximum  
 45 likelihood phylogenetic tree of the *V. cholerae* 7PET O139 sub-lineage, constructed from  
 46 whole genome SNPs relative to the *V. cholerae* H01 long-read reference genome. Tree tips are  
 47 coloured by place of isolation (see key). Colour bars depict the O139 clade/wave (see key),  
 48 whilst gold and green heatmaps represent presence/absence of various virulence factors and  
 49 vibrio pathogenicity islands, respectively (see key). CTX phage bar indicates the percentage  
 50 presence of the entire CTX-phage region (24,248 bp) of O139 strains mapped against N16961  
 51 region (VC\_1451 to VC\_1465) on a scale of 0 to 1. Scale bar represents the number of  
 52 substitutions per site per genome.

53

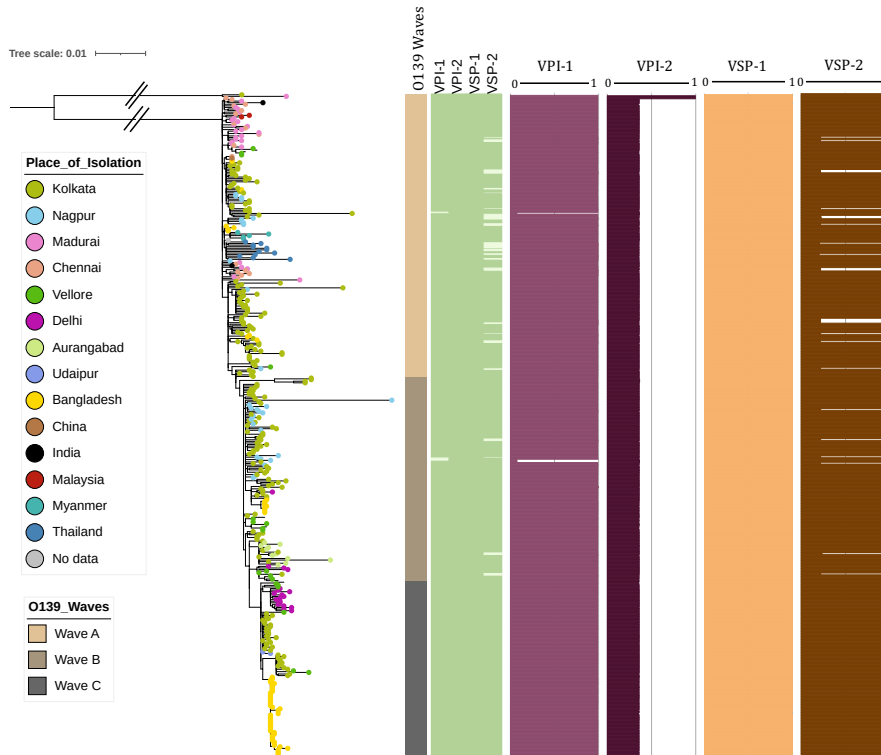

54

55 **S. Figure 7: Maximum likelihood phylogenetic tree of the 7PET O139 sub-lineage.**

56 Color bar indicates the O139 waves (wave A-C). Heatmap represents the

57 presence/absence of VPI-1 (VC\_0817 to VC\_0847: 40883 bp), VPI-2 (VC\_1758 to

58 VC\_1809: 56770 bp), VSP-1 (VC\_017 to VC\_0186: 16679 bp) and VSP-2 (VC\_0489

59 to VC\_0517: 31651 bp) islands. Color bar indicates the percentage presence of the

60 entire regions of VPI-1, VPI-2, VSP-1 and VSP-2 islands of O139 strains mapped

61 against N16961 region on a scale of 0 to 1. Scale bar represents the number of

62 substitutions per site per genome.

63

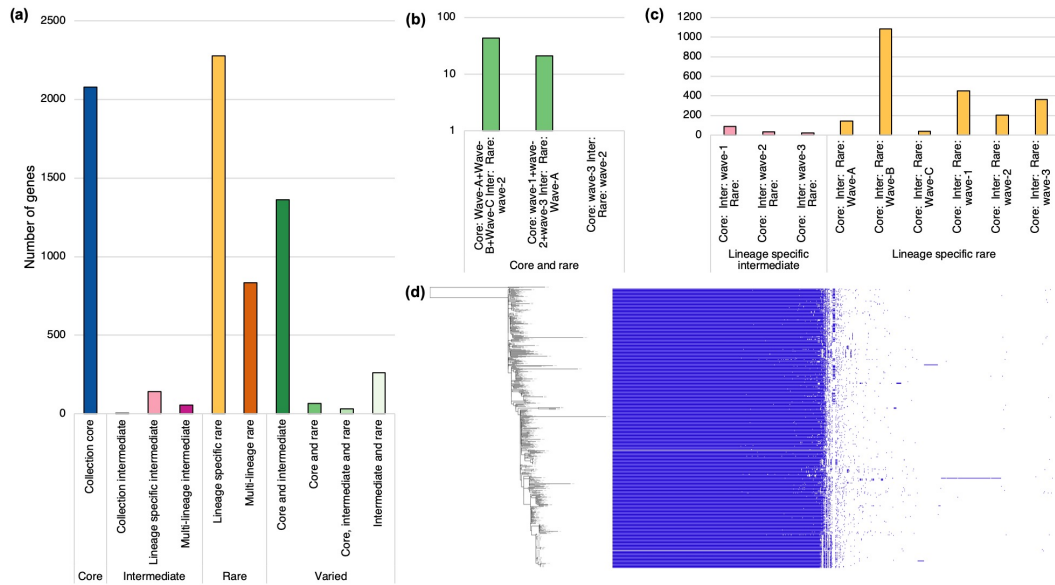

64

65 **S. Figure 8: Pan genome analysis of *V. cholerae* O139.** (a) Distribution of genes  
 66 among different gene categories, as classified using the software Twilight after  
 67 clustering using Roary. (b) Number of genes core to some groups but rare to others  
 68 (“varied frequency” among groups). (c) Number of lineage-specific intermediate  
 69 frequency or rare genes. (d) *V. cholerae* O139 pan genome matrix visualised against  
 70 the *V. cholerae* 7PET O139 subtree. Blue blocks represent genes.

71

72 **Supplement Table 1: Genome characteristics of non-7PET O139 serogroup *V.***  
 73 ***cholerae***

| Marker genes |                  | 22776_8#<br>124 | 22776_8#<br>104 | 23385_1#<br>115 | 23385_1#<br>47 | 23385_1#<br>57 | 23385_1#<br>160 | 23385_1#<br>52 |
|--------------|------------------|-----------------|-----------------|-----------------|----------------|----------------|-----------------|----------------|
| Species      | <i>ompW</i>      | +               | +               | +               | +              | +              | +               | +              |
| Serogroup    | <i>wbfZ_0139</i> | -               | -               | -               | -              | +              | +               | +              |
| 7PET         | <i>VC2346</i>    | -               | -               | -               | -              | -              | -               | -              |
| Virulence    | <i>ace</i>       | -               | -               | -               | -              | -              | -               | -              |
|              | <i>als</i>       | +               | +               | +               | +              | +              | +               | +              |
|              | <i>chxA</i>      | -               | +               | -               | -              | -              | -               | -              |
|              | <i>ctxA</i>      | -               | -               | -               | -              | -              | -               | -              |
|              | <i>hlyA</i>      | +               | +               | +               | +              | +              | +               | +              |



|                              |                   |                |                |                |                                        |                |                                |                                |
|------------------------------|-------------------|----------------|----------------|----------------|----------------------------------------|----------------|--------------------------------|--------------------------------|
|                              | <i>ompT</i>       | +              | -              | -              | -                                      | -              | -                              | -                              |
|                              | <i>ompU</i>       | +              | -              | -              | -                                      | -              | -                              | -                              |
|                              | <i>makA</i>       | +              | -              | +              | -                                      | +              | +                              | +                              |
|                              | <i>mshA</i>       | +              | +              | -              | -                                      | -              | -                              | -                              |
|                              | <i>rtxA</i>       | +              | +              | +              | +                                      | +              | +                              | +                              |
|                              | <i>toxR</i>       | +              | +              | +              | +                                      | +              | +                              | +                              |
|                              | <i>vasX</i>       | -              | -              | -              | +                                      | -              | -                              | -                              |
|                              | <i>vcsC2</i>      | +              | -              | +              | -                                      | +              | -                              | -                              |
|                              | <i>vcsN2</i>      | +              | +              | +              | -                                      | +              | -                              | -                              |
|                              | <i>vcsV2</i>      | +              | +              | +              | -                                      | +              | -                              | -                              |
|                              | <i>vgrG</i>       | -              | -              | -              | -                                      | -              | -                              | -                              |
|                              | <i>vspD</i>       | +              | +              | +              | -                                      | +              | -                              | -                              |
|                              | <i>zot</i>        | -              | -              | -              | -                                      | -              | -                              | -                              |
| MGE                          | <i>intl1</i>      | -              | -              | -              | +                                      | -              | -                              | -                              |
| AMR                          | <i>bla-CARB-9</i> | -              | -              | +              | -                                      | -              | -                              | -                              |
|                              | <i>catB9</i>      | -              | -              | -              | -                                      | -              | -                              | -                              |
|                              | <i>drfA1</i>      | -              | -              | -              | +                                      | +              | -                              | -                              |
|                              | <i>gyrA</i>       | +              | +              | -              | -                                      | -              | -                              | -                              |
|                              | <i>parC</i>       | +              | +              | +              | +                                      | +              | +                              | +                              |
|                              | <i>parE</i>       | +              | +              | -              | +                                      | +              | +                              | +                              |
|                              | <i>strA</i>       | -              | -              | -              | +                                      | -              | -                              | -                              |
|                              | <i>strB</i>       | -              | -              | -              | +                                      | -              | -                              | -                              |
|                              | <i>sul2</i>       | -              | -              | -              | +                                      | -              | -                              | -                              |
|                              | <i>ICE9_floR</i>  | -              | -              | -              | +                                      | -              | -                              | -                              |
| Vibrio pathogenicity islands | VPI-I             | -              | -              | -              | VC0847                                 | -              | -                              | -                              |
|                              | VPI-II            | VC1758, VC1776 | VC1758, VC1776 | VC1758, VC1776 | VC1790                                 | VC1758, VC1776 | VC1758, VC1776, VC1783, VC1790 | VC1758, VC1776, VC1783, VC1790 |
|                              | VSP-I             | -              | -              | -              | VC0183, VC0185, VC0175, VC0178, VC0180 | -              | -                              | -                              |

|  |        |        |                              |   |   |   |   |   |
|--|--------|--------|------------------------------|---|---|---|---|---|
|  | VSP-II | VC0498 | VC0498,<br>VC0490,<br>VC0493 | - | - | - | - | - |
|--|--------|--------|------------------------------|---|---|---|---|---|

74

75

76

**Supplementary Table 2:** Lineage specific genes identified in the *Vibrio cholerae* genomes

77

| Row Labels                                       | Count of details |
|--------------------------------------------------|------------------|
| <b>Core and intermediate</b>                     | <b>1363</b>      |
| Core: B1+B2 Inter: B3+wave-1+wave-2+wave-3 Rare: | 1                |
| Core: B1+B2+B3 Inter: wave-1+wave-2+wave-3 Rare: | 324              |
| Core: B1+B2+B3 Inter: wave-2 Rare:               | 8                |
| Core: B1+B2+B3 Inter: wave-2+wave-3 Rare:        | 5                |
| Core: B1+B2+B3+wave-1 Inter: wave-2+wave-3 Rare: | 15               |
| Core: B1+B2+B3+wave-1+wave-2 Inter: wave-3 Rare: | 80               |
| Core: B1+B2+B3+wave-1+wave-3 Inter: wave-2 Rare: | 10               |
| Core: B1+B2+B3+wave-2 Inter: wave-1+wave-3 Rare: | 346              |
| Core: B1+B2+B3+wave-2+wave-3 Inter: wave-1 Rare: | 419              |
| Core: B1+B2+B3+wave-3 Inter: wave-1+wave-2 Rare: | 51               |
| Core: B1+B2+B3+wave-3 Inter: wave-2 Rare:        | 48               |
| Core: B1+B3 Inter: B2+wave-1+wave-2+wave-3 Rare: | 1                |
| Core: B1+B3+wave-1+wave-2+wave-3 Inter: B2 Rare: | 7                |
| Core: B2+B3 Inter: B1+wave-1+wave-2+wave-3 Rare: | 1                |
| Core: B2+B3+wave-1+wave-3 Inter: B1+wave-2 Rare: | 6                |
| Core: B3 Inter: B1+B2+wave-1+wave-2+wave-3 Rare: | 11               |
| Core: B3+wave-1 Inter: B1+B2+wave-2+wave-3 Rare: | 8                |
| Core: B3+wave-1+wave-3 Inter: B1+B2+wave-2 Rare: | 2                |
| Core: B3+wave-3 Inter: B1+B2+wave-1+wave-2 Rare: | 4                |
| Core: wave-1+wave-2+wave-3 Inter: B1+B2+B3 Rare: | 2                |
| Core: wave-2 Inter: B1+B2+B3+wave-1+wave-3 Rare: | 2                |
| Core: wave-2+wave-3 Inter: B1+B2+B3+wave-1 Rare: | 2                |
| Core: wave-3 Inter: wave-2 Rare:                 | 10               |
| <b>Core and rare</b>                             | <b>65</b>        |
| Core: B1+B2+B3 Inter: Rare: wave-2               | 43               |
| Core: wave-1+wave-2+wave-3 Inter: Rare: B1       | 21               |
| Core: wave-3 Inter: Rare: wave-2                 | 1                |
| <b>Core, intermediate and rare</b>               | <b>33</b>        |
| Core: B1+B2+B3 Inter: wave-2 Rare: wave-1+wave-3 | 1                |
| Core: B2 Inter: B1+B3 Rare: wave-3               | 1                |
| Core: B2+B3 Inter: B1 Rare: wave-3               | 1                |
| Core: B3+wave-1 Inter: B1+B2+wave-2 Rare: wave-3 | 2                |
| Core: wave-1 Inter: wave-2+wave-3 Rare: B1       | 2                |
| Core: wave-1+wave-2 Inter: wave-3 Rare: B1       | 2                |

|                                               |             |
|-----------------------------------------------|-------------|
| Core: wave-1+wave-3 Inter: wave-2 Rare: B1    | 2           |
| Core: wave-2 Inter: wave-1+wave-3 Rare: B1    | 1           |
| Core: wave-2+wave-3 Inter: wave-1 Rare: B1    | 15          |
| Core: wave-3 Inter: B1+B2+wave-2 Rare: wave-1 | 3           |
| Core: wave-3 Inter: wave-1+wave-2 Rare: B1    | 3           |
| <b>Grand Total</b>                            | <b>1461</b> |

78

79 B1: O139 Wave-A, B2: O139 Wave-B, B3: O139 Wave-C, wave -1: O1 wave-1, wave-

80 2: O1 wave-2, wave-3: O1 wave-3.
