# Supplementary material for: Vibrio cholerae O139 genomes provide a clue to why it may have failed to usher in the eighth cholera pandemic
Source: PubMed Central journal article supplement (PMC9256687; doi:10.1038/s41467-022-31391-4), 2022-07-05
Supplement: 41467_2022_31391_MOESM3_ESM.pdf [file 41467_2022_31391_MOESM3_ESM.pdf]

## **Description of Additional Supplementary Files**

File Name: Supplementary Data 1

Description: List of Accession IDs of *Vibrio cholerae* genomes used in this study
